# Supplementary material
Source: PubMed Central journal article supplement (PMC9278052)
Supplement: NIHMS1817447-supplement-Sanchez_PMID34648369_SciImmunol_2021_SupplFigs.pdf [file NIHMS1817447-supplement-Sanchez_PMID34648369_SciImmunol_2021_SupplFigs.pdf]

Supplementary Materials for  
**Fractionating a COVID-19 Ad5-vectored vaccine improves  
virus-specific immunity**

Sarah Sanchez *et al.*

Corresponding author: Pablo Penaloza-MacMaster, ppm@northwestern.edu

*Sci. Immunol.* **6**, eabi8635 (2021)  
DOI: 10.1126/sciimmunol.abi8635

**The PDF file includes:**

Figs. S1 to S7

**Other Supplementary Material for this manuscript includes the following:**

Data files S1 to S3

## CD4 T cell subset differentiation

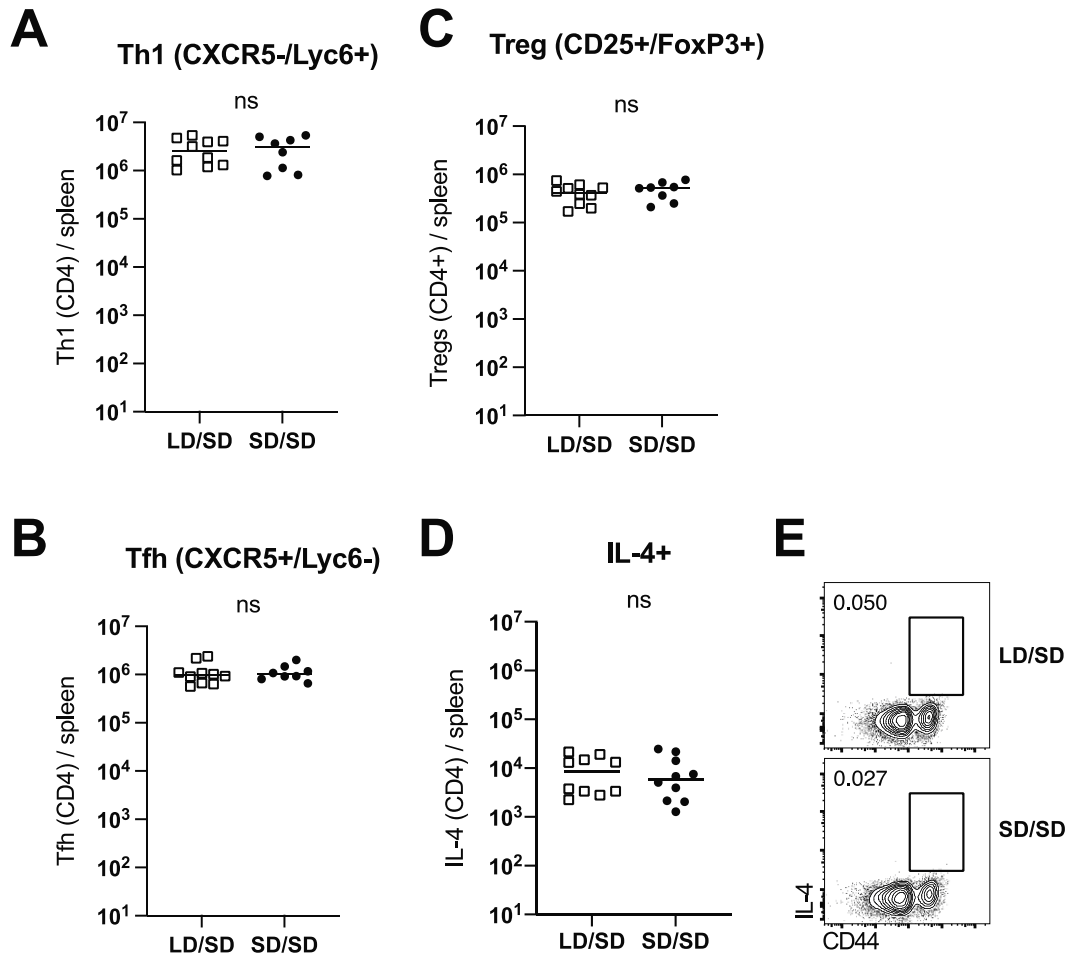

**Fig. S1. CD4<sup>+</sup> T cell subset differentiation following Ad5 vaccine prime fractionation.** (A) Summary of Th1 responses. (B) Summary of T follicular helper (Tfh) responses. (C) Summary of T regulatory (Treg) cell responses. (D) Summary of IL-4<sup>+</sup> responses. (E) Representative FACS plots showing the frequencies of IL-4<sup>+</sup> responses (gated from live CD4<sup>+</sup> T cells). We show FACS plots to highlight that IL-4 expression appeared to be near the limit of detection. In panels D-E, splenocytes were incubated with overlapping SARS-CoV-2 peptide pools in the presence of GolgiStop and GolgiPlug to detect IL-4<sup>+</sup> CD4<sup>+</sup> T cell responses. All data are from spleen. Data from panels A-C are from two experiments, one with n=5 per group, and another with n=3-5 per group. Data from panels D-E are from two experiments, each with n=5 per group. Data are from day 14 post-boost. All data are shown. Not significant (ns) *P* values were determined by parametric test (unpaired t test).

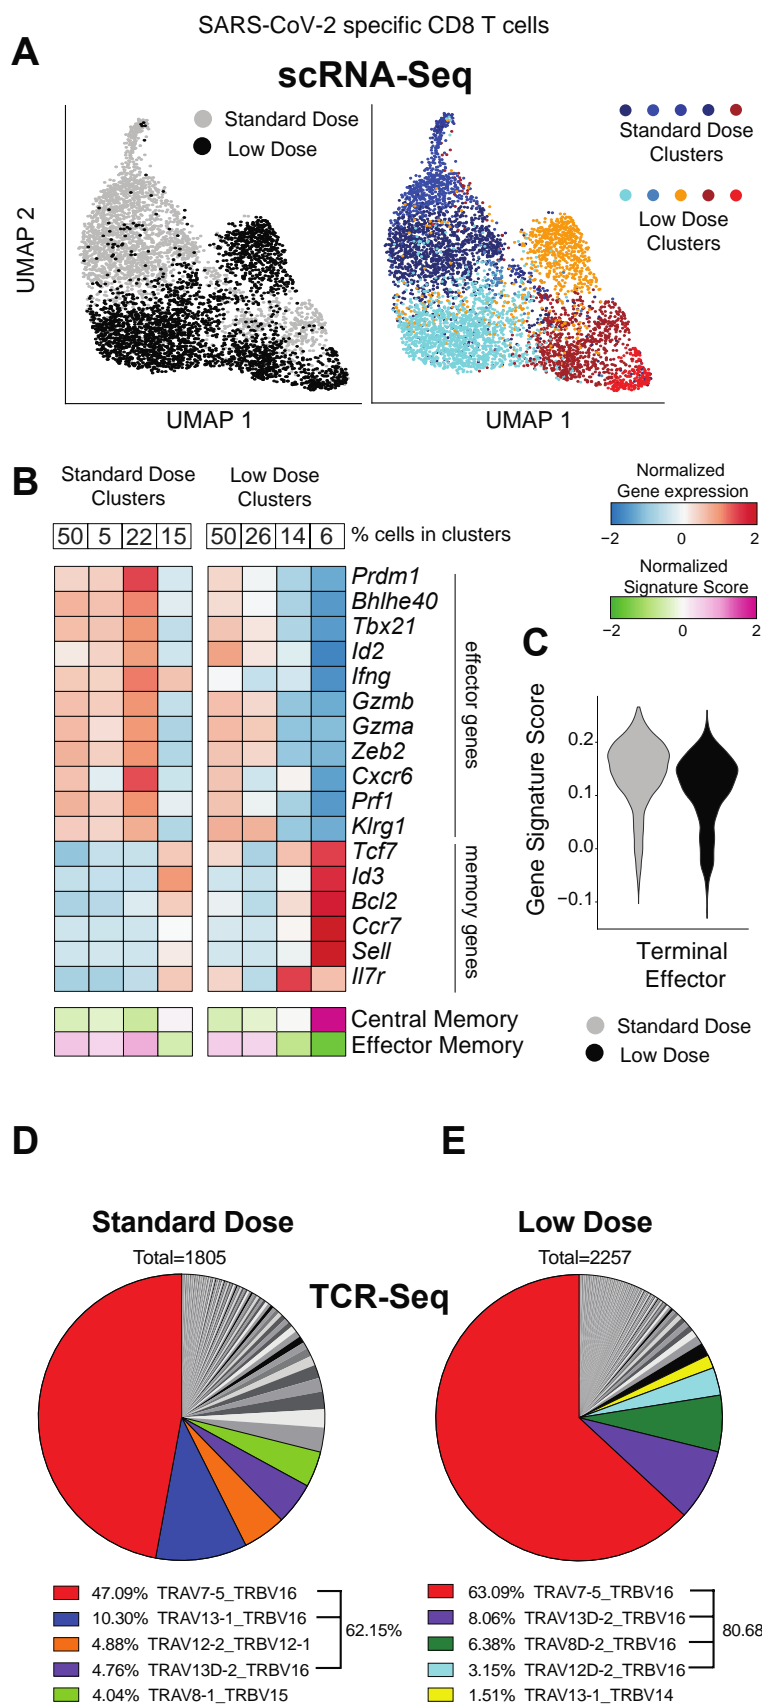

**Fig. S2. Single cell RNA-seq analyses demonstrate that a low dose prime favors central memory CD8<sup>+</sup> T cell differentiation.** Mice were immunized with  $10^6$  or  $10^9$  PFU of Ad5-SARS-2 spike, and at day 28, splenic CD8<sup>+</sup> T cells were MACS-sorted. Subsequently, live, CD8<sup>+</sup>, CD44<sup>+</sup>, K<sup>b</sup> VL8<sup>+</sup> cells were FACS-sorted to ~99% purity for scRNA-seq (A-C) and scTCR-seq (D-E). **(A)** UMAP plots showing populations colored by regimen (left plot). Standard and low dose cells were clustered separately and UMAP (right plot) shows unsupervised cell clusters. **(B)** Heatmap showing row-standardized expression of selected effector and memory genes or gene signatures (bottom rows). For each population, percentages of cells in each cluster are indicated (top row). **(C)** Violin plot showing the normalized expression of the Terminal Effector signature in the SD and LD populations. Experiment in panels A-C was performed once with a total of 2,574 and 2,837 individual cells from a spleen per group (LD and SD, respectively). **(D)** Pie chart showing the distribution of TCRa and TCRb gene usage after SD prime. **(E)** Pie chart showing the distribution of TCRa and TCRb gene usage after LD prime. Experiment in panels D-E was performed once with a total of 2,032 and 2,431 individual cells from a spleen per group (LD and SD, respectively). Total number above the pie chart show the number of single cells selected for downstream analyses, and different colors below highlight the top 5 TCR usages and their relative proportion.

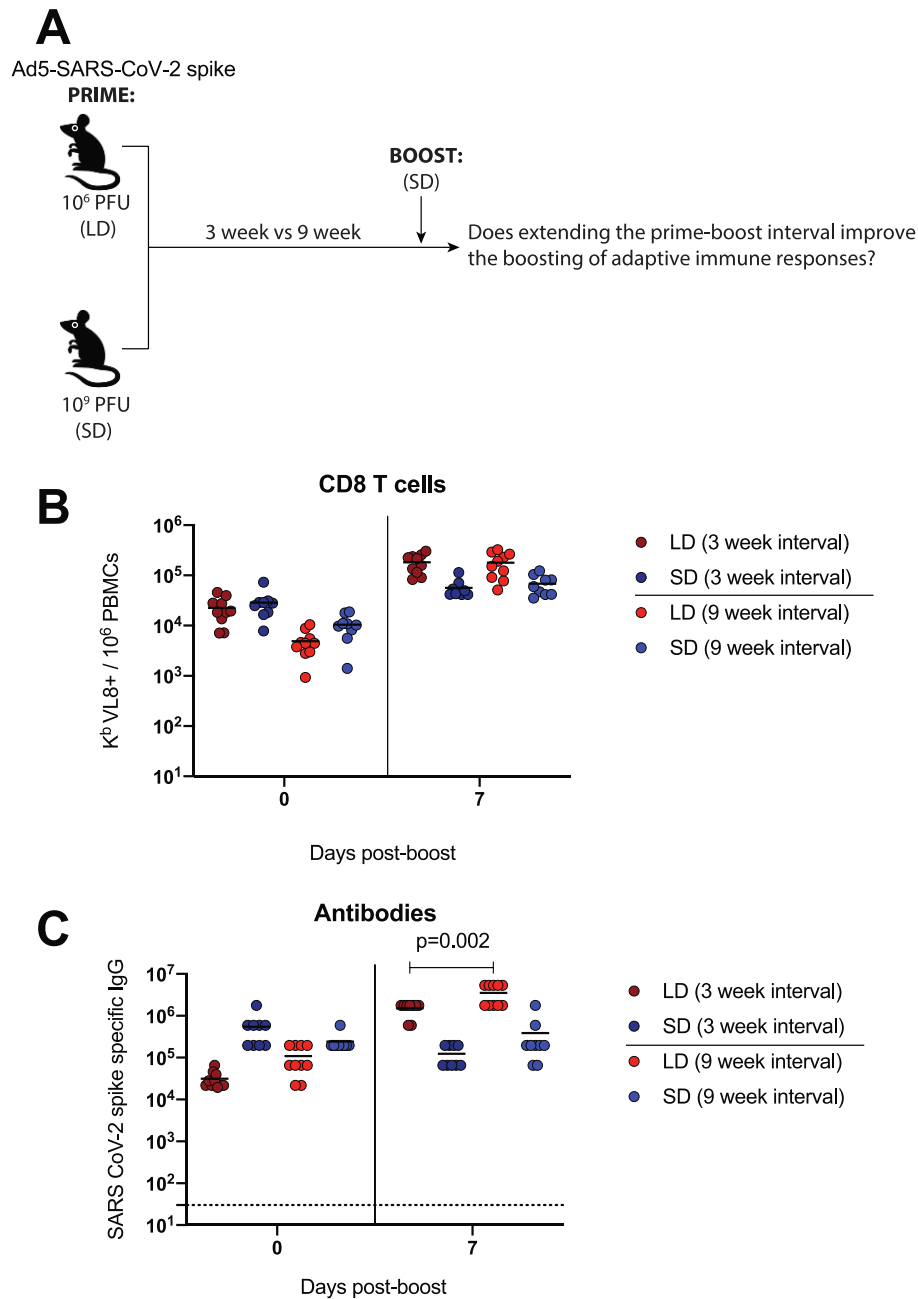

**Fig. S3. Effect of extending the prime-boost interval on CD8+ T cells and antibody responses.** (A) Experimental approach for evaluating how the prime-boost interval affects adaptive immune responses following Ad5 vector immunization. (B) Summary of SARS-CoV-2-specific CD8<sup>+</sup> T cell responses in PBMCs. (C) Summary of SARS-CoV-2 specific antibody responses in sera. Data are from two experiments, one with n=5 per group, and another with n=4-5 per group. All data are shown. Dashed line indicates limit of detection. Indicated *P* value was determined by two-way ANOVA (Dunnett's multiple comparisons test).

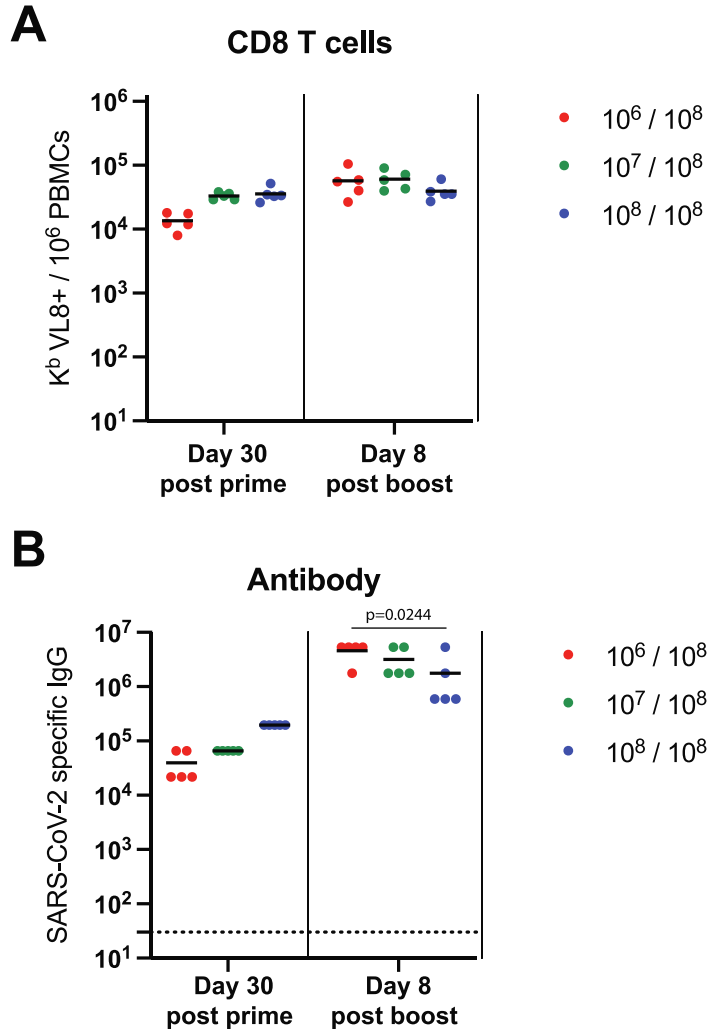

**Fig. S4. Effect of “narrow” prime dose escalation on CD8<sup>+</sup> T cells and antibody responses.** (A) Summary of SARS-CoV-2-specific CD8<sup>+</sup> T cell responses in PBMCs. (B) Summary of SARS-CoV-2 specific antibody responses in sera. Mice were primed with  $10^6$  PFU,  $10^7$  PFU, or  $10^8$  PFU of Ad5-SARS-CoV-2 spike. All mice were boosted with  $10^8$  PFU of Ad5-SARS-CoV-2 spike after day 30 post-prime. Data are from one experiment with  $n=5$  per group (three different priming groups). All data are shown. Dashed line indicates limit of detection. Indicated  $P$  value was determined by two-way ANOVA (Dunnett’s multiple comparisons test).

## Vector-specific antibody

**A**

Experiment 1

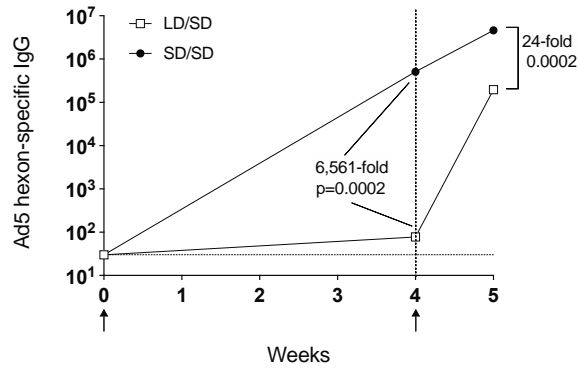

**B**

Experiment 2

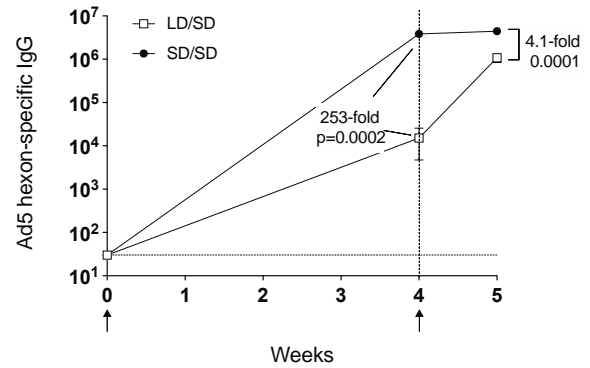

**Fig. S5. Ad5 vector-specific antibody responses following Ad5 vaccine fractionation.** (A) Summary of Ad5 hexon-specific antibody responses in sera (Experiment 1). (B) Summary of Ad5 hexon-specific antibody responses in sera (Experiment 2). Data are from two experiments, each with  $n=5$  per group. All data are shown. Indicated  $P$  value was determined by parametric test (unpaired  $t$  test). Dashed line indicates limit of detection. Error bars represent SEM, but in these experiments little variability within groups was observed rendering some error bars small.

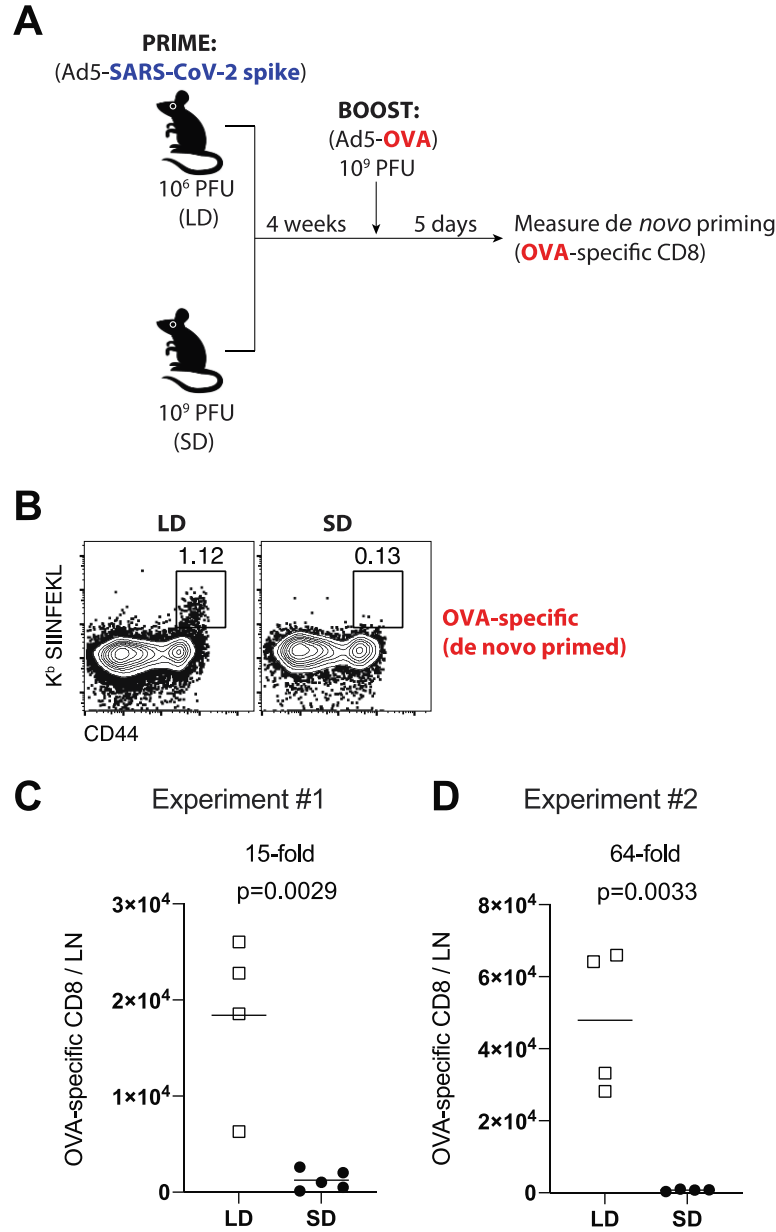

**Fig. S6. Effect of an LD prime on de novo CD8+ T cell priming following a subsequent booster immunization.** Effect of an LD Ad5 prime on de novo priming following a subsequent re-utilization of Ad5. **(A)** Experimental approach for evaluating how immunity raised by an LD prime affects de novo priming following subsequent re-utilization of Ad5. **(B)** Representative FACS plots showing the frequencies of OVA-specific CD8+ T cells (K<sup>b</sup> SIINFEKL+) in draining lymph nodes. **(C)** Summary of OVA-specific CD8+ T cells in draining lymph nodes in the first experiment. **(D)** Summary of OVA-specific CD8+ T cells in draining lymph nodes in the second experiment. Data are from two experiments, each with n=5 per group. All data are shown. Indicated *P* value was determined by parametric test (unpaired t test).

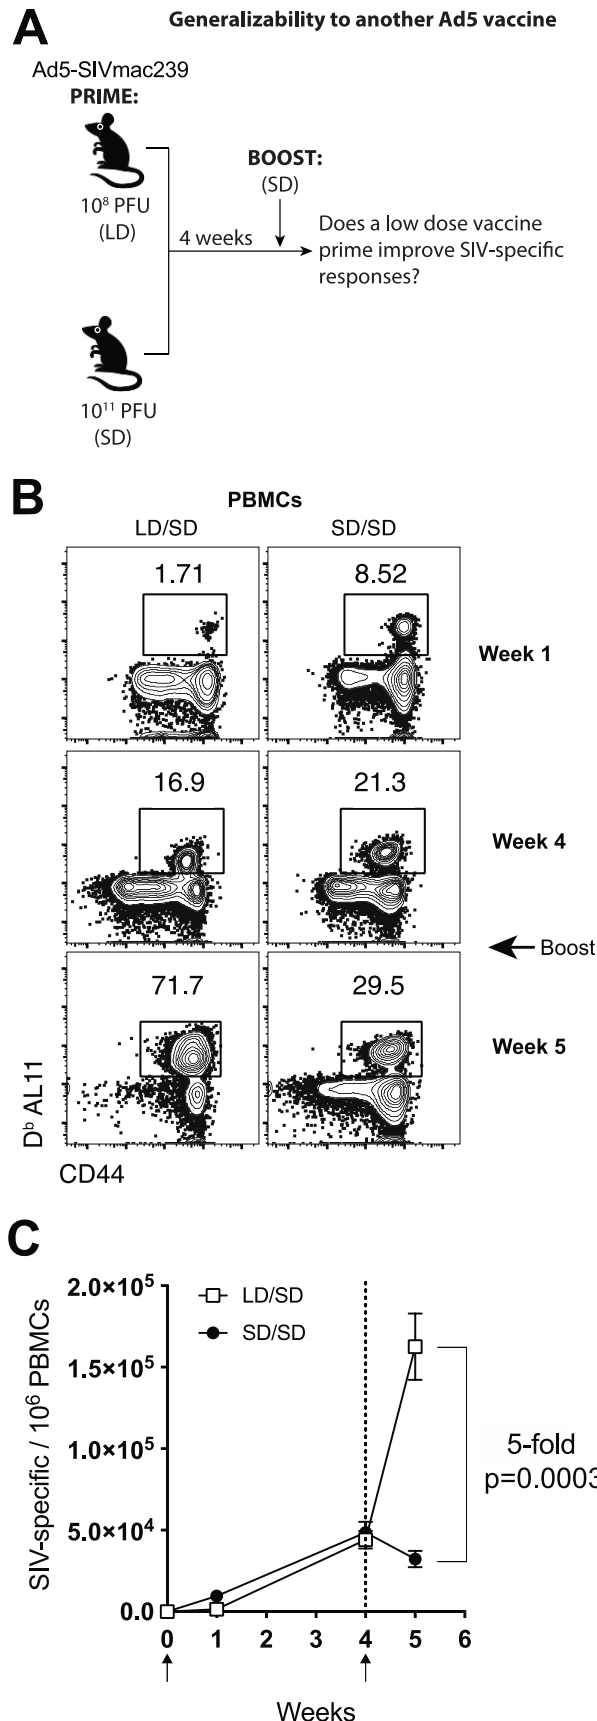

**Fig. S7. Effect of LD prime on Ad5-SIV vaccination.** (A) Experimental approach for evaluating how the priming dose of an Ad5-SIV Gag vaccine affects SIV-specific responses. (B) Representative FACS plots showing the frequencies of SIV Gag-specific CD8<sup>+</sup> T cells (K<sup>b</sup> AL11+) in PBMCs. (C) Summary of SIV Gag-specific CD8<sup>+</sup> T cell responses in PBMCs. The Ad5 expressed the Gag protein from SIVmac239. We used 10<sup>8</sup> PFU of Ad5-SIV as the LD, because this vector was not immunogenic at the  $\leq 10^7$  PFU dose. Data are from one experiment with n=5 per group. All data are shown. Indicated *P* values were determined by parametric test (unpaired t test). Error bars represent SEM.

### **Supplementary data files**

**Data S1. (separate file).** Average gene expression on the main four clusters of SARS-CoV-2-specific CD8<sup>+</sup> T cells from each condition (LD vs SD prime). Gene expression derived from scRNAseq. See fig. S2 for more information.

**Data S2. (separate file).** Overall gene expression of SARS-CoV-2-specific CD8<sup>+</sup> T cells from each condition (LD vs SD prime). Average gene expression derived from scRNAseq. See fig. S2 for more information.

**Data S3. (separate file).** Raw data.
